# Supplementary material for: The Fifth International Workshop on Ice Nucleation Phase 3 (FIN-03): Field Intercomparison of Ice Nucleation Measurements
Source: Copernicus journal article supplement (doi:10.5194/egusphere-2024-1744), 2024-06-21
Supplement: Supplementary file 1 [file egusphere-2024-1744-supplement-version3.pdf]

# Field Intercomparison of Ice Nucleation Measurements: The Fifth International Workshop on Ice Nucleation Phase 3 (FIN-03)

## Supporting Information

Paul J. DeMott<sup>1</sup>, Jessica A. Mirrielees<sup>2,a</sup>, Sarah Suda Petters<sup>3,b</sup>, Daniel J. Cziczo<sup>4,c</sup>, Markus D. Petters<sup>3,d</sup>, Heinz G. Bingemer<sup>5</sup>, Thomas C. J. Hill<sup>1</sup>, Karl Froyd<sup>6,7,e</sup>, Sarvesh Garimella<sup>4,f</sup>, A. Gannet Hallar<sup>8,9</sup>, Ezra J.T. Levin<sup>1,g</sup>, Ian B. McCubbin<sup>8,9</sup>, Anne E. Perring<sup>7,h</sup>, Christopher N. Rapp<sup>c</sup>, Thea Schiebel<sup>10,i</sup>, Jann Schrod<sup>5</sup>, Kaitlyn J. Suski<sup>1j</sup>, Daniel Weber<sup>5,k</sup>, Martin J. Wolfe<sup>3,l</sup>, Maria Zawadowicz<sup>3,m</sup>, Jake Zenker<sup>2,n</sup>, Ottmar Möhler<sup>10</sup> and Sarah D. Brooks<sup>2</sup>

<sup>1</sup>Department of Atmospheric Science, Colorado State University, Fort Collins, CO, USA

<sup>2</sup>Department of Atmospheric Sciences, Texas A&M University, College Station, TX, USA

<sup>3</sup>Department of Marine, Earth and Atmospheric Sciences, North Carolina State University, Raleigh, NC, USA

<sup>4</sup>Department of Earth, Atmospheric and Planetary Sciences, Massachusetts Institute of Technology, Cambridge, MA, USA

<sup>5</sup>Institute for Atmospheric and Environmental Sciences, Goethe University Frankfurt, 60438 Frankfurt am Main, Germany

<sup>6</sup>NOAA Earth System Research Laboratory, Boulder, CO, USA

<sup>7</sup>CIRES, University of Colorado, Boulder, CO, USA

<sup>8</sup>Storm Peak Laboratory, Department of Atmospheric Sciences, University of Utah, Salt Lake City, Utah, USA

<sup>9</sup>Department of Atmospheric Sciences, University of Utah, Salt Lake City, Utah, USA

<sup>10</sup>Institute of Meteorology and Climate Research (IMK-AAF), Karlsruhe Institute of Technology (KIT), Eggenstein-Leopoldshafen, Germany

<sup>a</sup>now at: Chemistry Department, University of Michigan, Ann Arbor, MI

<sup>b</sup>now at: Center for Environmental Research and Technology, University of California, Riverside, Riverside, CA, USA

<sup>c</sup>now at: Department of Earth, Atmospheric, and Planetary Sciences, Purdue University, West Lafayette, IN, USA

<sup>d</sup>now at: Riverside, Department of Chemical and Environmental Engineering, University of California, Riverside, CA, USA

<sup>e</sup>now at: Air Innova, Boulder, CO, USA

<sup>f</sup>now at: ACME AtronOmatic, LLC, Portland, OR, USA

<sup>g</sup>now at: Colorado Department of Public Health and Environment, Denver CO, USA

<sup>h</sup>now at: Department of Chemistry, Colgate University, Hamilton, NY, USA

<sup>i</sup>now at: Faculty 8- Mathematics and Physics, University of Stuttgart, Stuttgart, Germany

<sup>j</sup>now at: Rainmaker Technology Corporation, El Segundo, CA, USA

<sup>k</sup>now at: Federal Waterways Engineering and Research Institute, Karlsruhe, Germany

<sup>l</sup>now at: Yale Center for Law and Policy, New Haven, CT, USA

<sup>m</sup>now at: Brookhaven National Laboratory, Richland, WA, USA

<sup>n</sup>now at: Sandia National Laboratories, Albuquerque, NM, USA

Correspondence: Paul J. DeMott ([Paul.Demott@colostate.edu](mailto:Paul.Demott@colostate.edu))

## S1. Weather conditions and photos

Photographs shown here are available at <https://sspetters.github.io/fin03/index.html> or upon request to Sarah Petters.

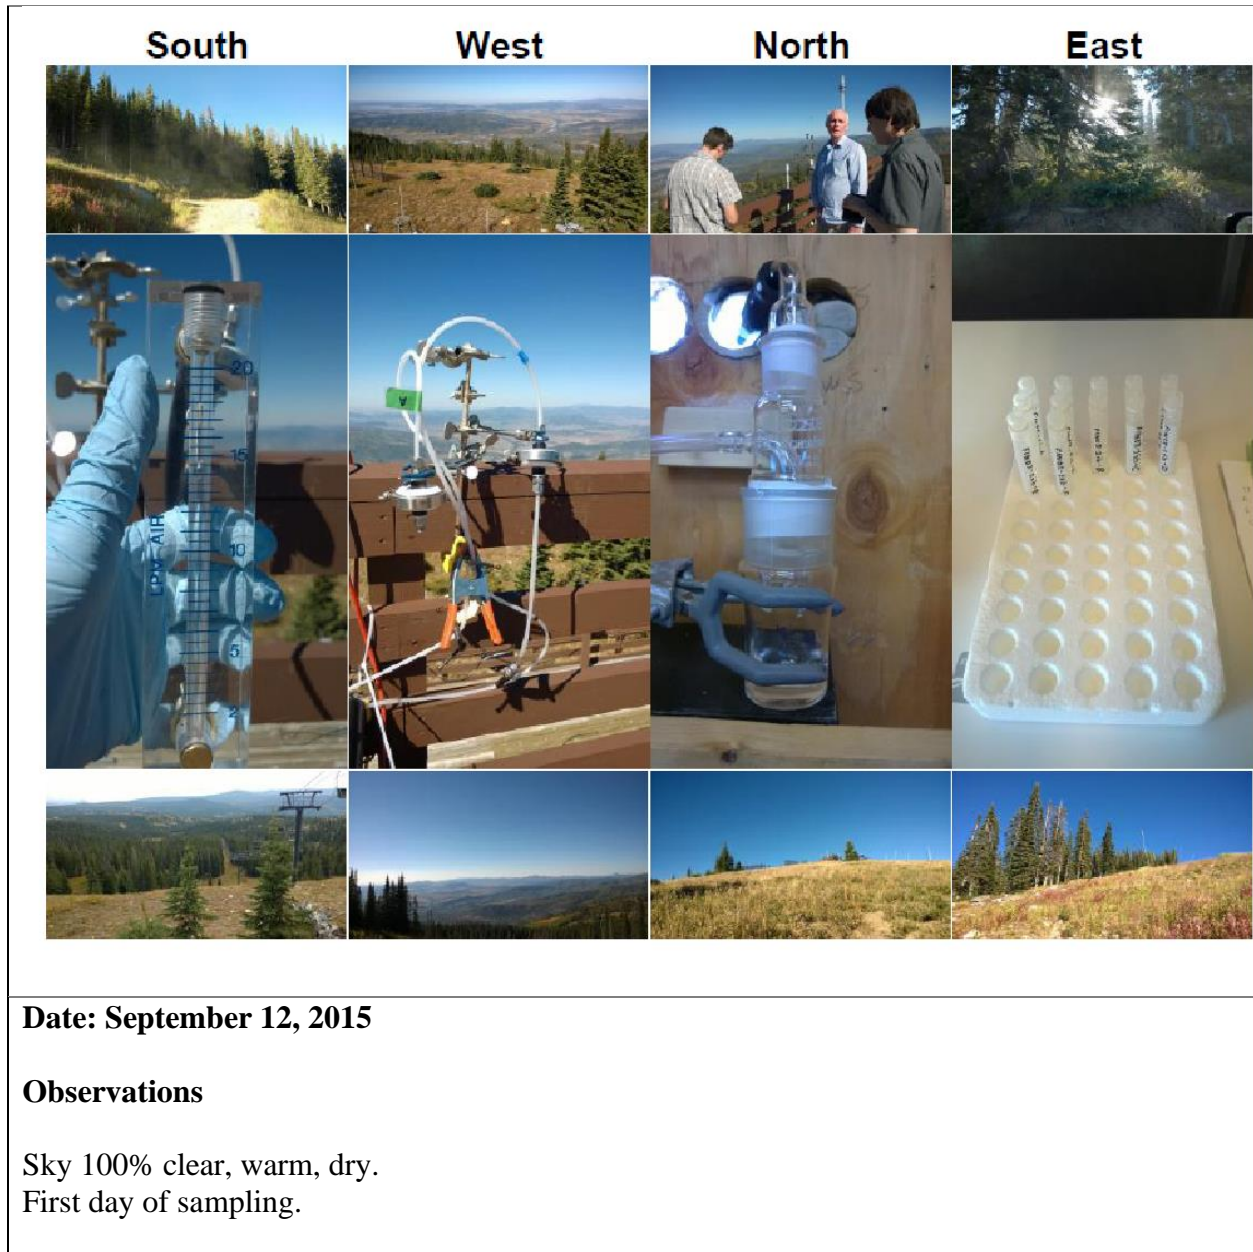

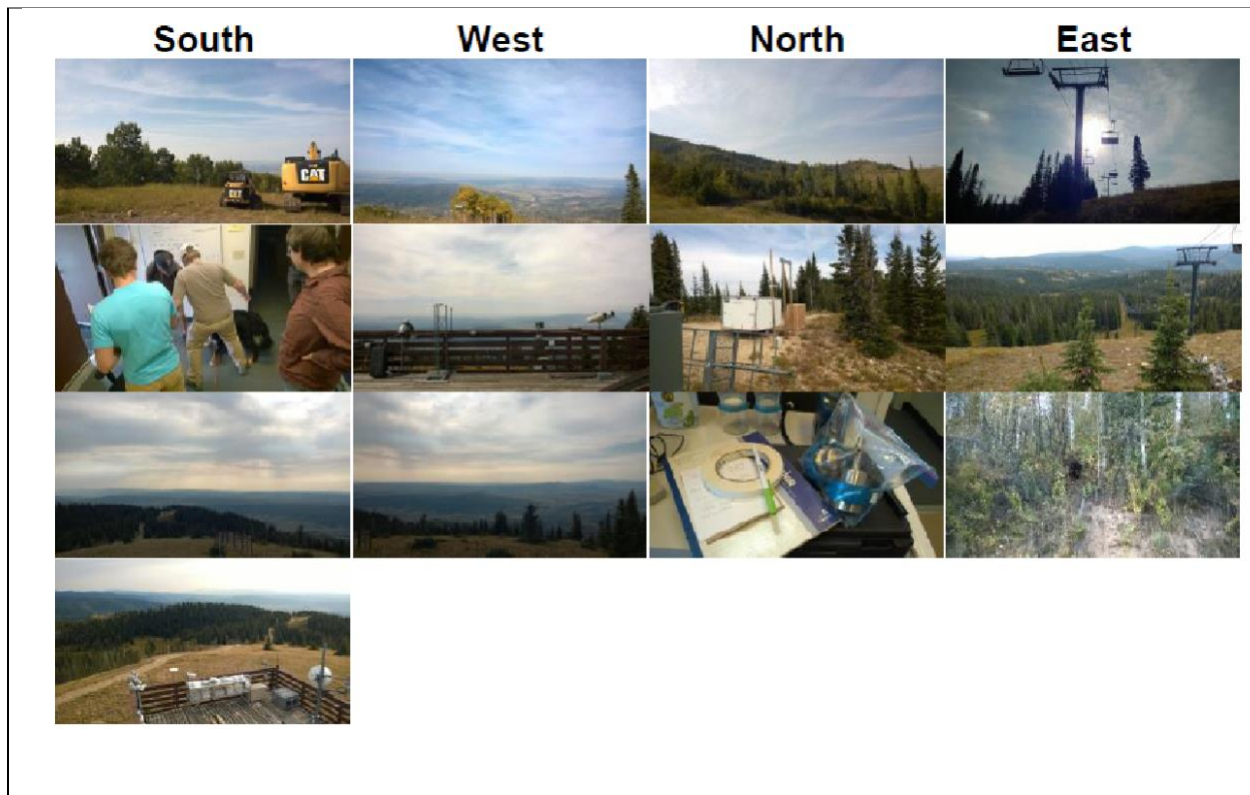

**Date: September 13, 2015**

**Observations**

Clouds arriving. The road was again dusty in the morning (not pictured). Brown haze layer is present.

Stronger winds from West in the daytime (10 AM - 4 PM).

1 PM: Very hazy now, thicker cirrostratus

3 PM: Very breezy. 70-80% coverage with altostratus.

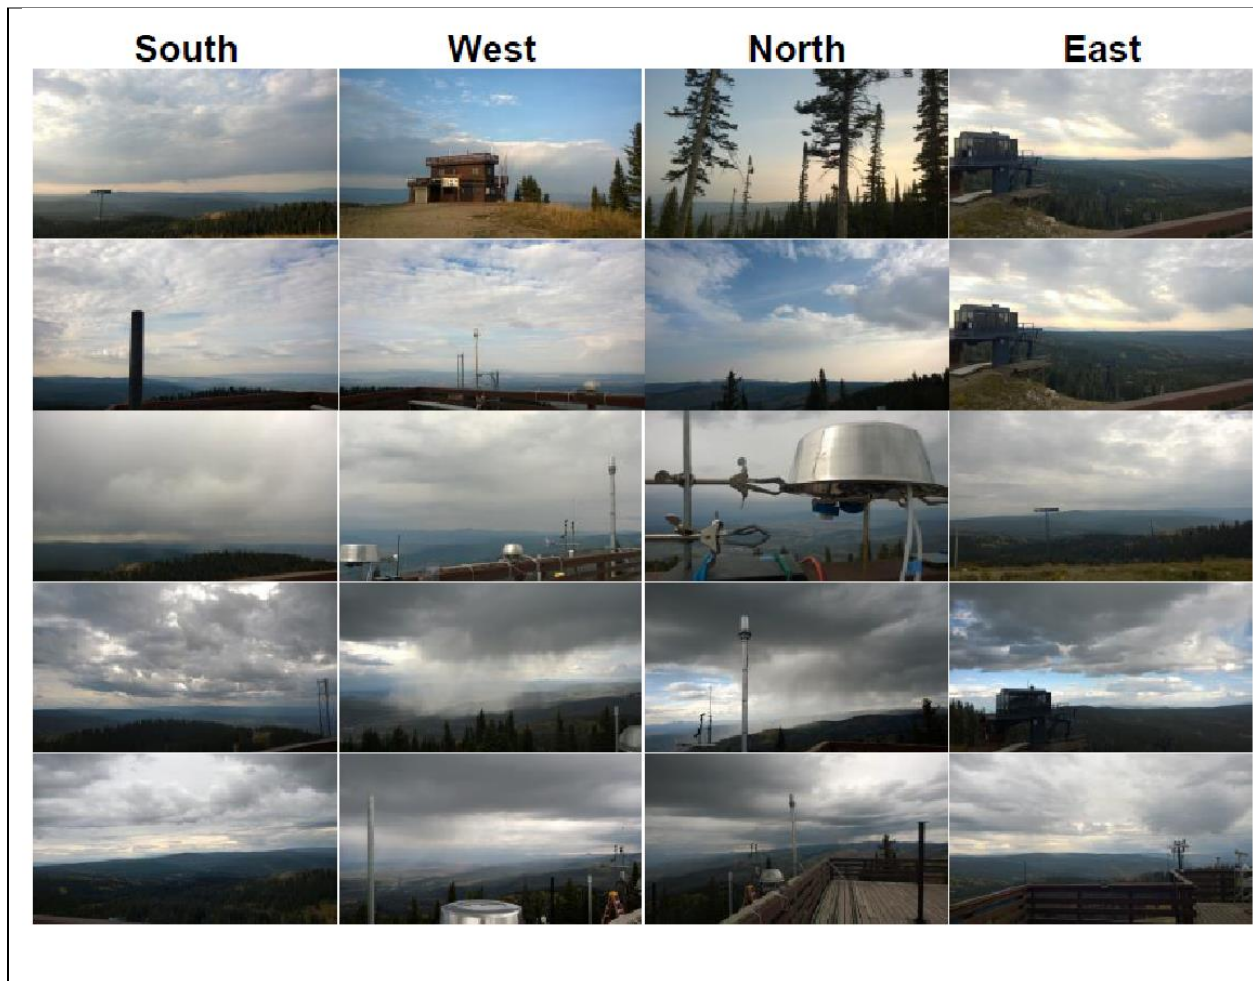

**Date: September 14, 2015**

**Observations**

Arrival of rain. Wind picked up after 6pm.

8-8:30 AM: Wind from direction of anvil cloud; transition to overcast; continued wind, clouds break up

8:45-9 AM: Vehicles arriving on dirt road; 8:50 AM: Sun breaking behind Skilift, patches of broken stratocumulus

9 AM: Clear in valley, hazy; 10:28,10:58 AM: Vehicles on dirt road; 1:20-1:50 PM: Wind dies, first drops of rain; rain stops

5:02 PM: Rain (8 minutes); 5:30 PM: Meeting. For road dust, later arrivals will park lower on road;

6:11 PM: Rain begins again, stays

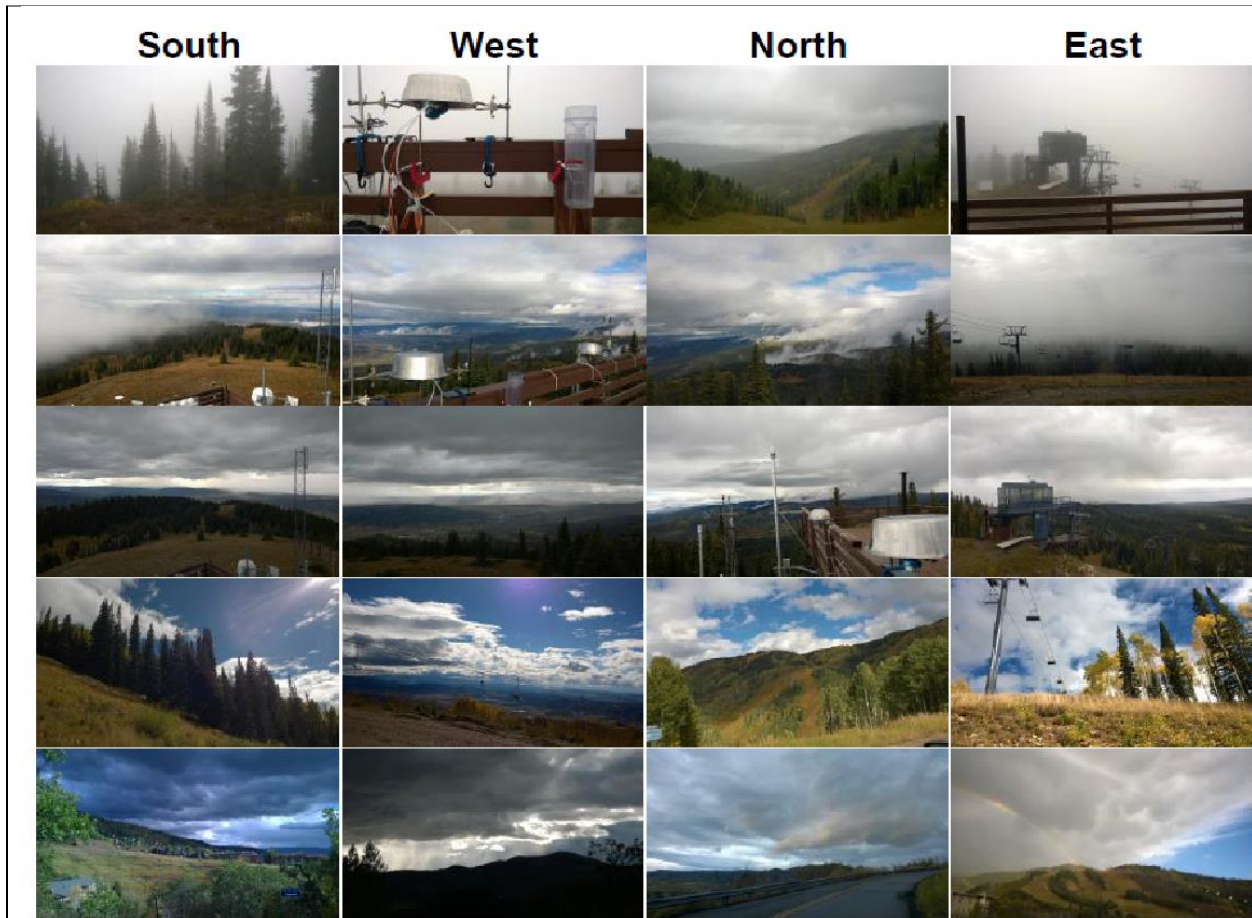

**Date: September 15, 2015**

**Observations**

Rain predicted through 2:30 PM, "elective downtime" today (intercomparison cancelled due to road conditions).

1:35 PM: Rain

1:45 PM: Raining quite hard, sideways

2:10 PM: Separation of cloud layers

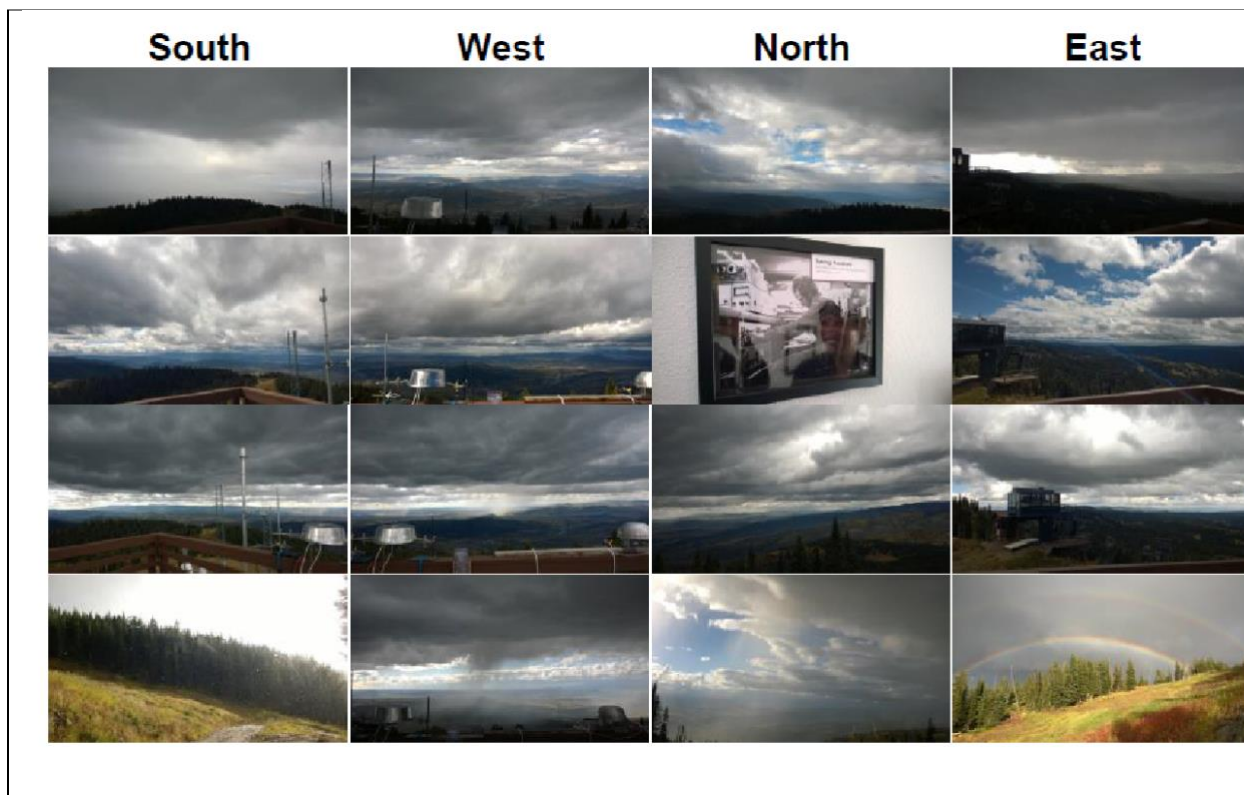

**Date: September 16, 2015**

**Observations**

Rain intermittently.

8:44 AM: Rain approaching; wind coming from downpour to west; 9 AM: Rain has begun and stopped

9 AM: Meeting: Bike race on dirt road over weekend; Free troposphere peaks at 6am; Starting this weekend there will be smoke from California on the West wind; Children will visit on Monday

1:06 PM: Raining again; 3:18 PM: 1-mm hail, roundish, for a couple of minutes; 3:25 PM: Small amount of rain

3:40 PM: Intercomparison cancelled; SPIN background issues; 3:41 PM: Hail again, 5 minutes

4:40 PM: Rain has stopped in valley, patchy cumulus

5:05 PM: 2 minutes of hail

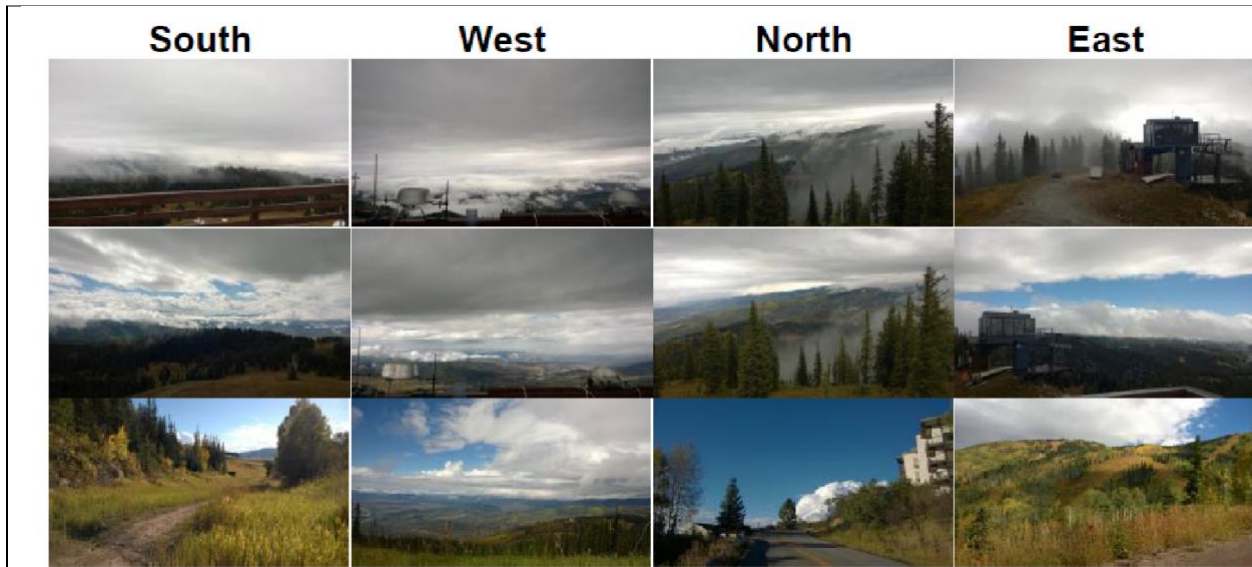

**Date: September 17, 2015**

**Observations**

Site closed after half day due to weather.  
10 AM: Arrive in fog/rain/snow; everything is wet  
10:30 AM: Rain has stopped  
11 AM: Snow and sleet again  
12:40 PM: Still raining

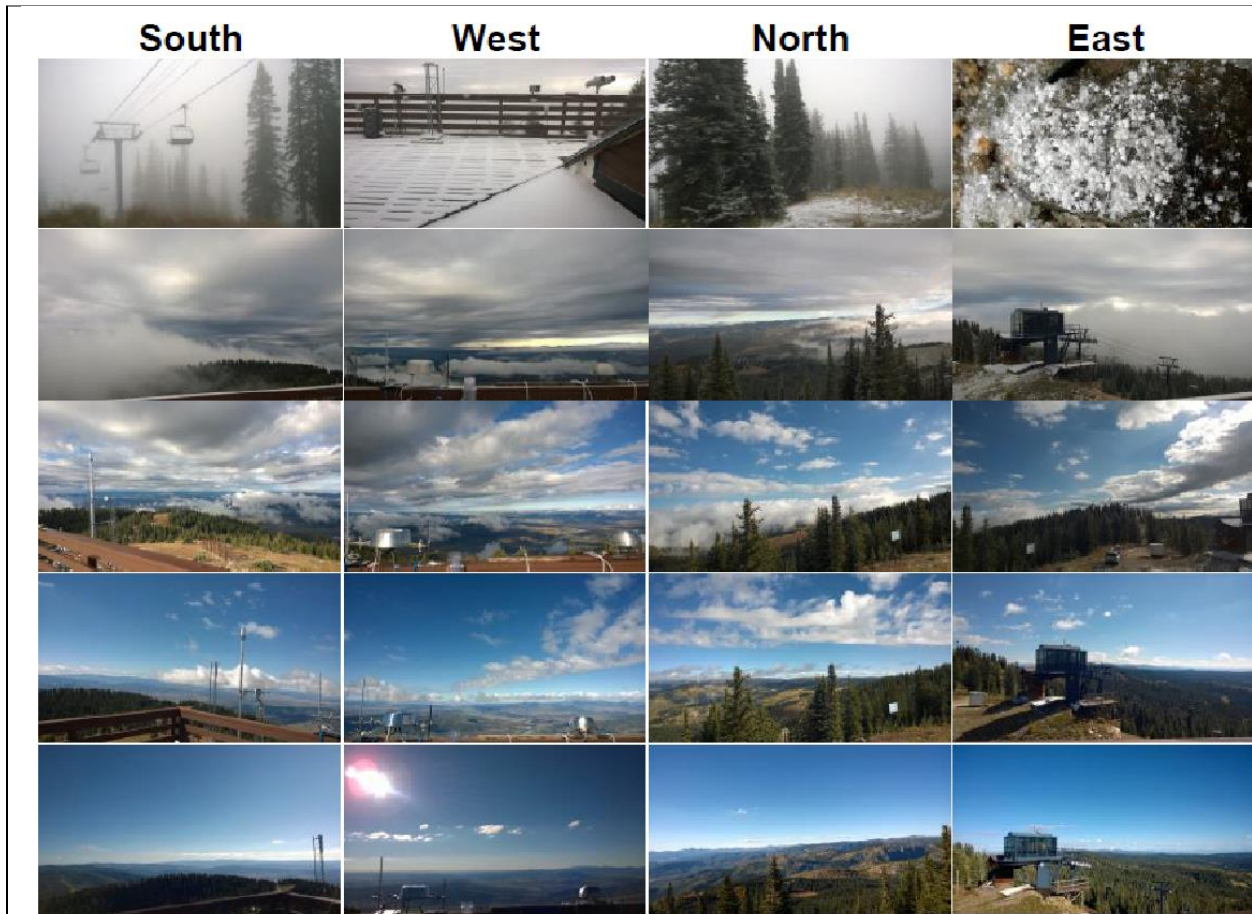

**Date: September 18, 2015**

**Observations**

Early snow, clear later.

8 AM: Arrive in snow/graupel; 8:20 AM: Snow depth 1/2 inch; 8:26 AM: Fog arrives, visibility low

9 AM: Sun is out; power plant plumes clearly visible in valley

10:32 AM: Clear sky above high cloud, clumpy low cumulus (much lower than past couple days), generally clear above, sunny, RH 51%

11:38 AM: Sunny, scattered cumulus in valley. Upper level cumulus height above mountain is constant (to East)

1:00 PM: Vehicles departing; 2:40 PM: Sunny, small amount of haze; 3:25 PM: Vehicles; 4:15 PM: Vehicle



|                                                                                              |             |              |                                                                                     |
|----------------------------------------------------------------------------------------------|-------------|--------------|-------------------------------------------------------------------------------------|
| <b>South</b>                                                                                 | <b>West</b> | <b>North</b> | <b>East</b>                                                                         |
|                                                                                              |             |              |  |
| <b>Date: September 19, 2015</b>                                                              |             |              |                                                                                     |
| <b>Observations</b>                                                                          |             |              |                                                                                     |
| Winds from West 10am-9pm. No precipitation was anticipated.<br>12 PM: No rain/snow overnight |             |              |                                                                                     |

|                          |
|--------------------------|
| <b>No photos taken</b>   |
| Date: September 20, 2015 |
| Observations             |
| <b>None</b>              |

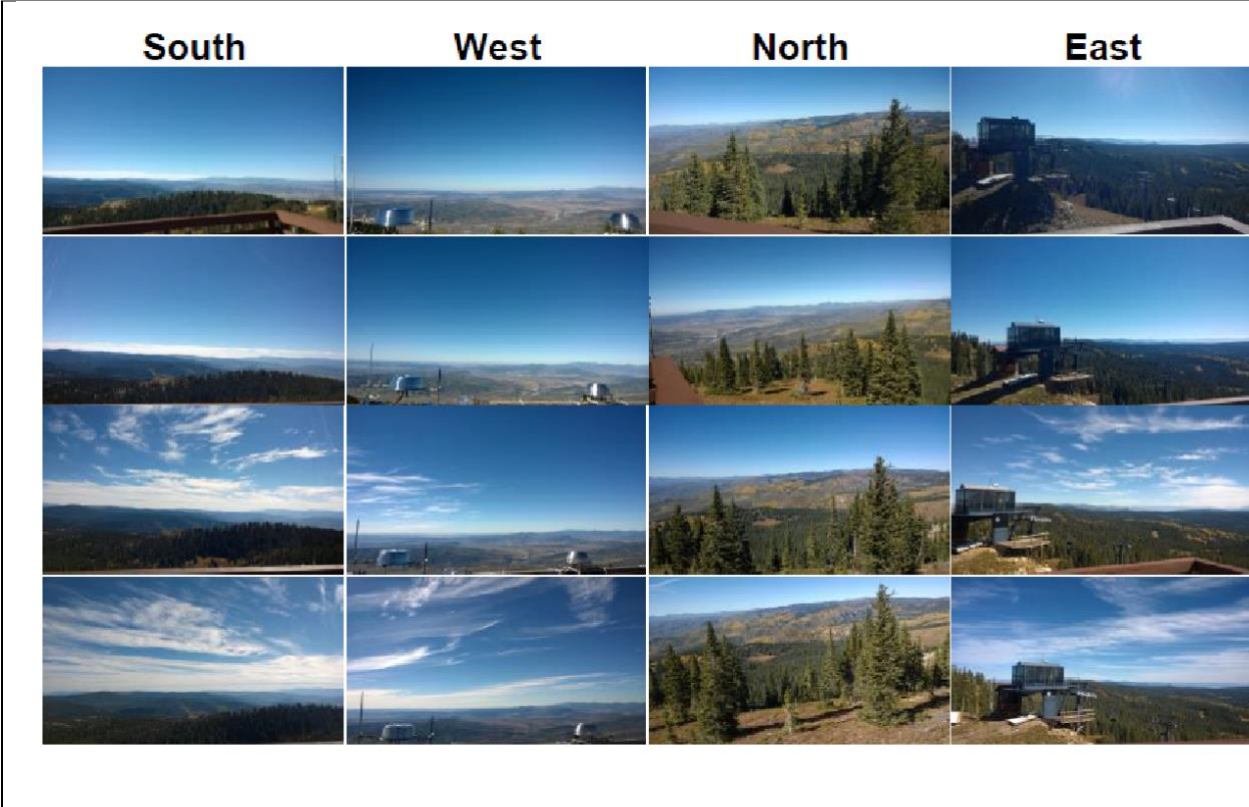

**Date: September 21, 2015**

**Observations**

Clear with high clouds.  
 10 AM: Clear and slightly hazy  
 11 AM: Vehicles

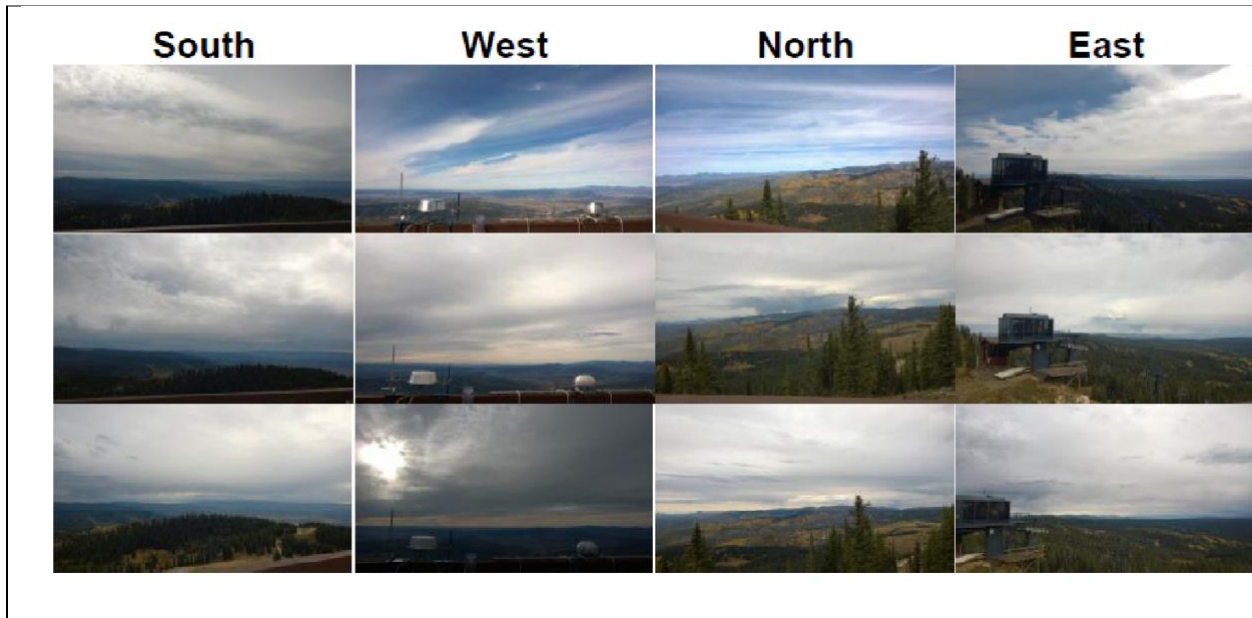

**Date: September 22, 2015**

**Observations**

Overcast without rain.

2 PM: Hazy with a couple of clouds downwind; Ian goes to block road after some discussions with Forest Service

3:48 PM: Virga descending on horizon; wind has died; thunderstorm downwind

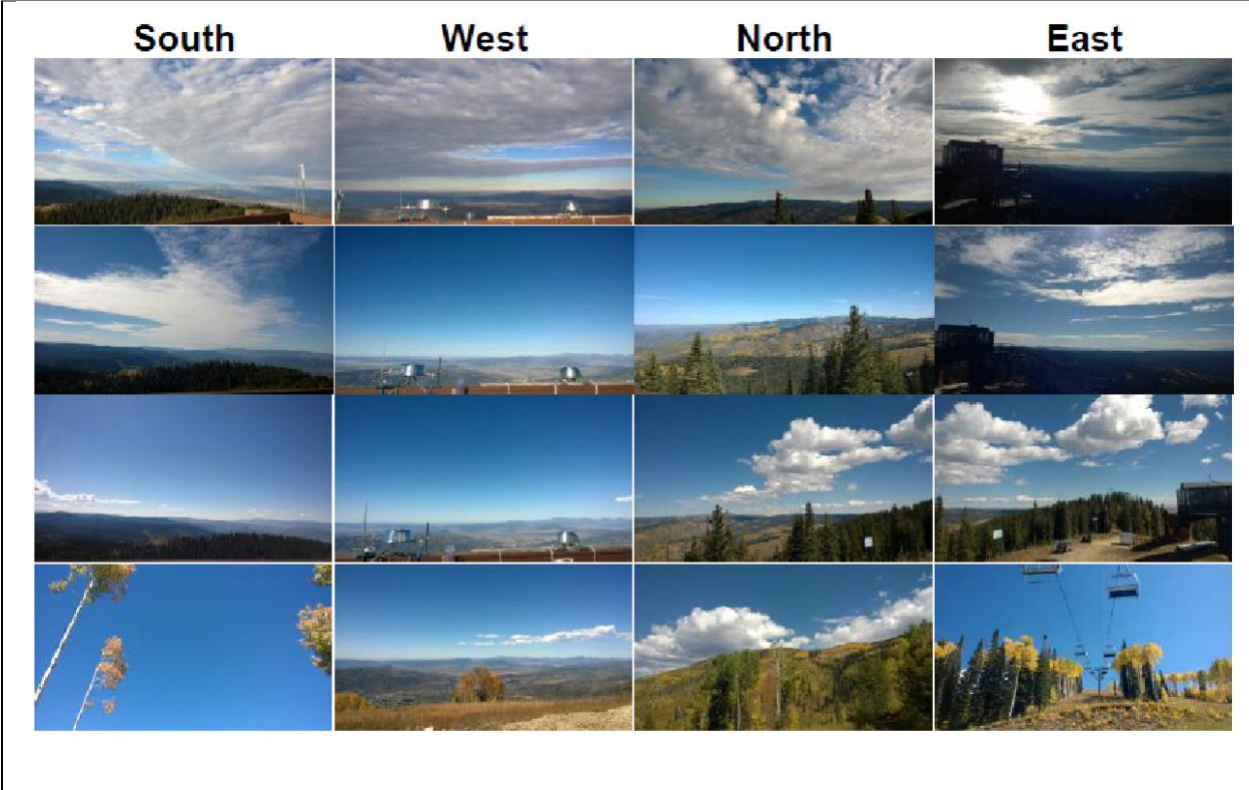

**Date: September 23, 2015**

**Observations**

Breezy, scattered clouds.

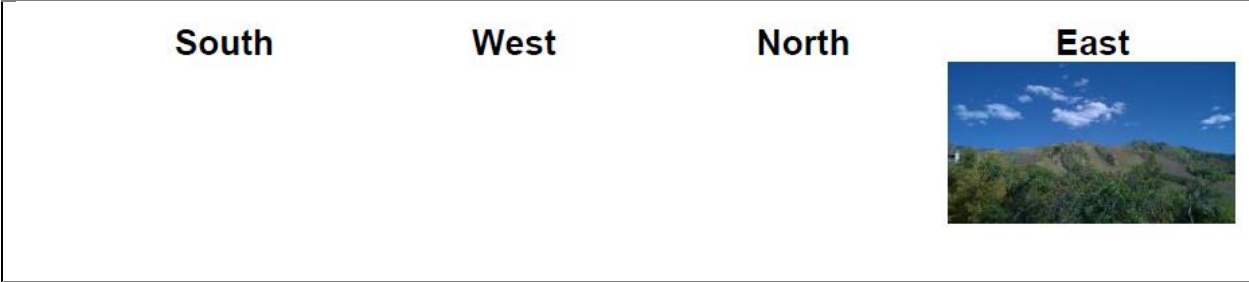

**Date: September 24, 2015**

**Observations**

None (mandatory downtime)

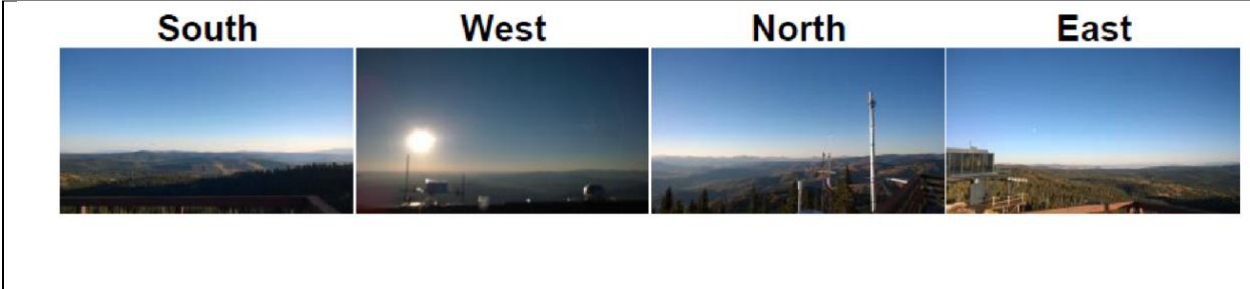

**Date: September 25, 2015**

**Observations**

Hazy day. Wind from NW after 10am.  
 8 AM: Sunny and hazy  
 11:30 AM: Fairly hazy  
 6:20 PM: Very hazy, slight breeze, no clouds

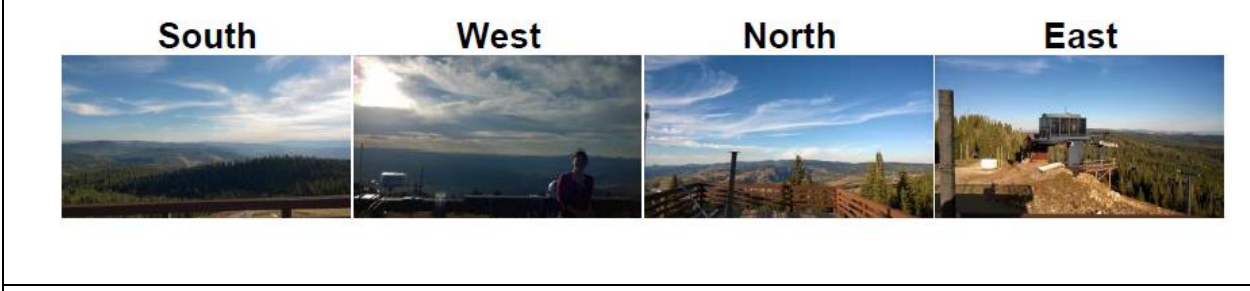

**Date: September 26, 2015**

**Observations**

Scattered high clouds.

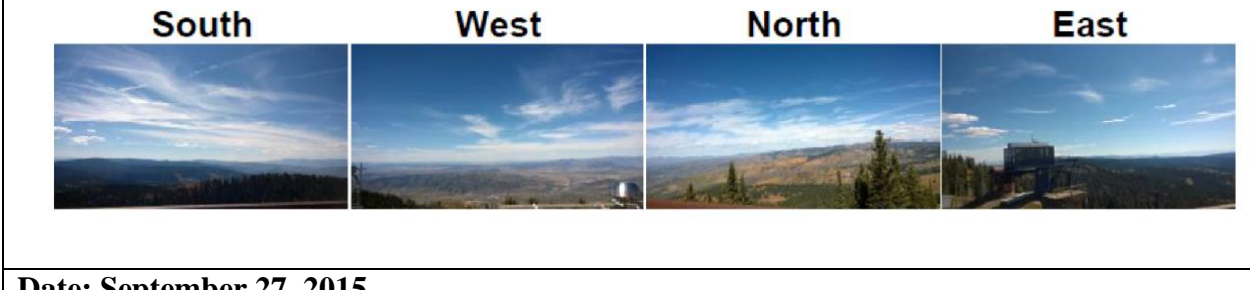

**Date: September 27, 2015**

**Observations**

Scattered high clouds.

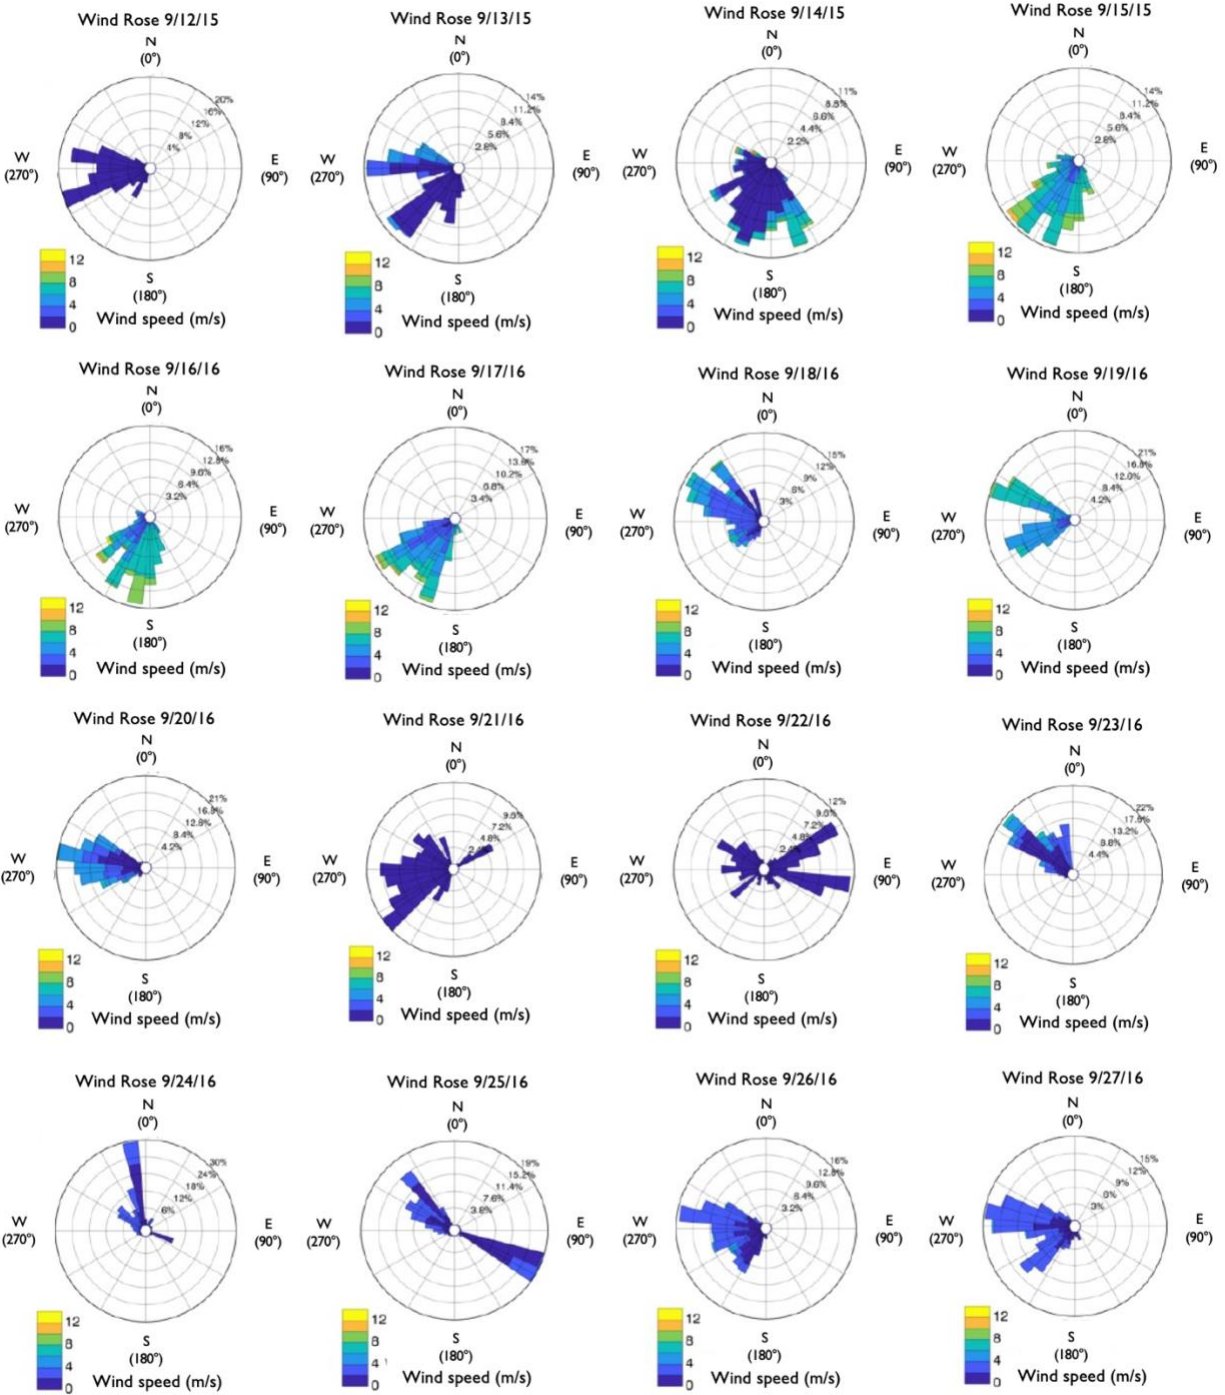

**Figure S1.** Wind roses displaying wind speed throughout FIN-03.

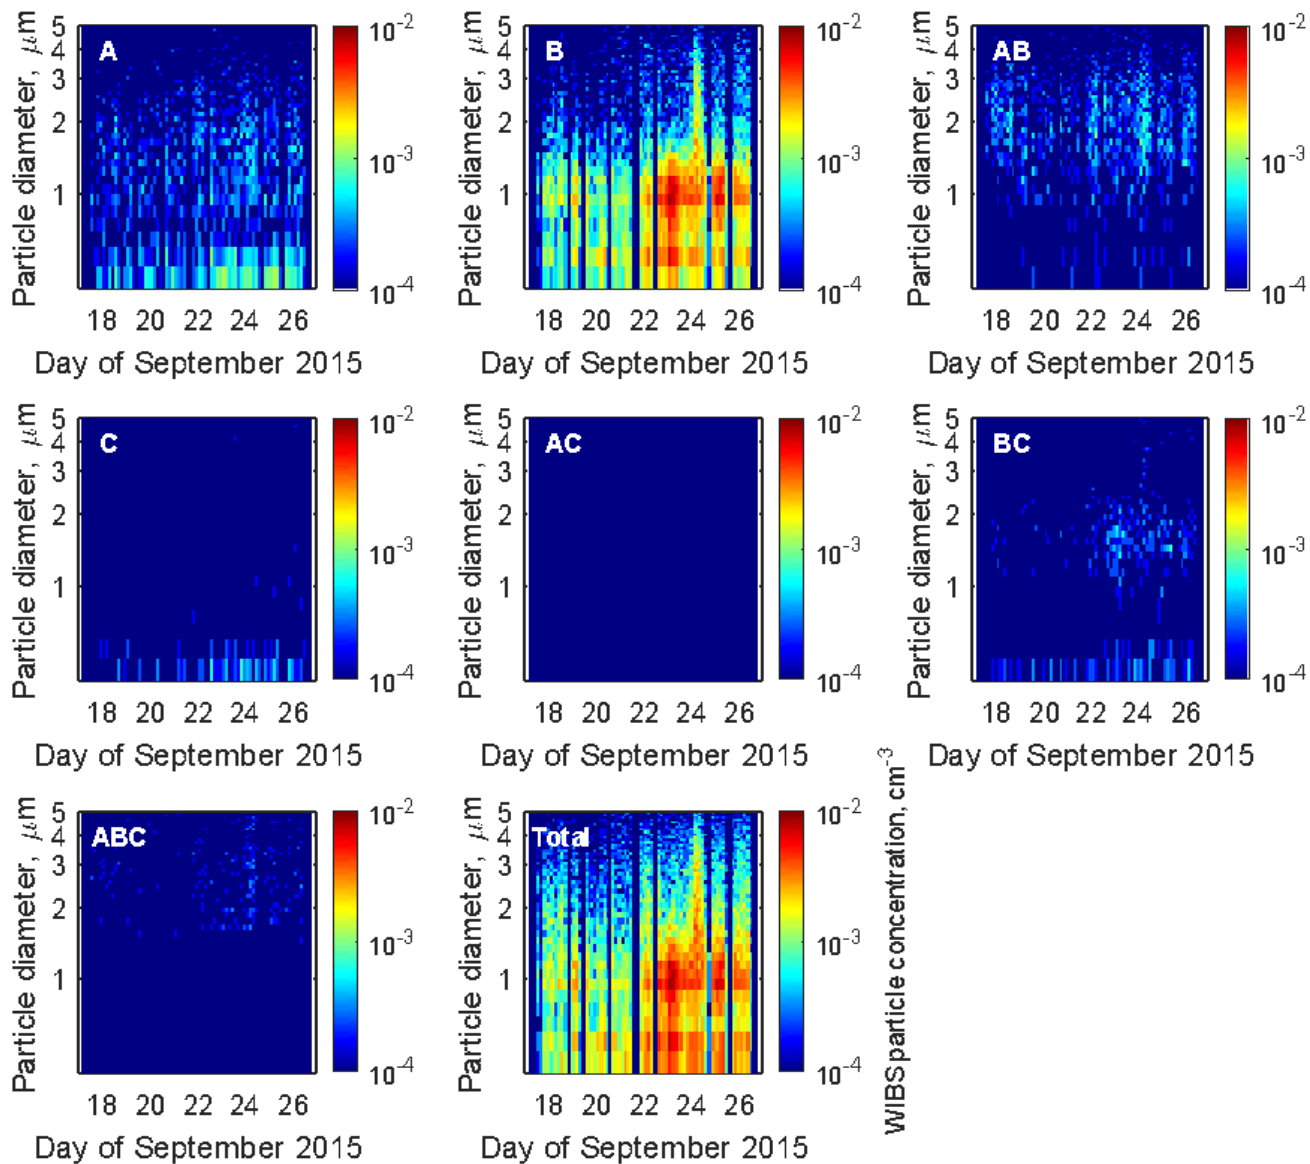

**Figure S2.** WBS time series heatmaps by particle type (A, B, AB, C, AC, BC, and ABC) as well as total (all fluorescing particles measured by the WBS which are categorized into one of the seven types). The WBS measures the concentration of particles with diameter 0.4 - 20  $\mu\text{m}$ , but the y-axis has been truncated at 5  $\mu\text{m}$  to show more detail in the range that held most particles.

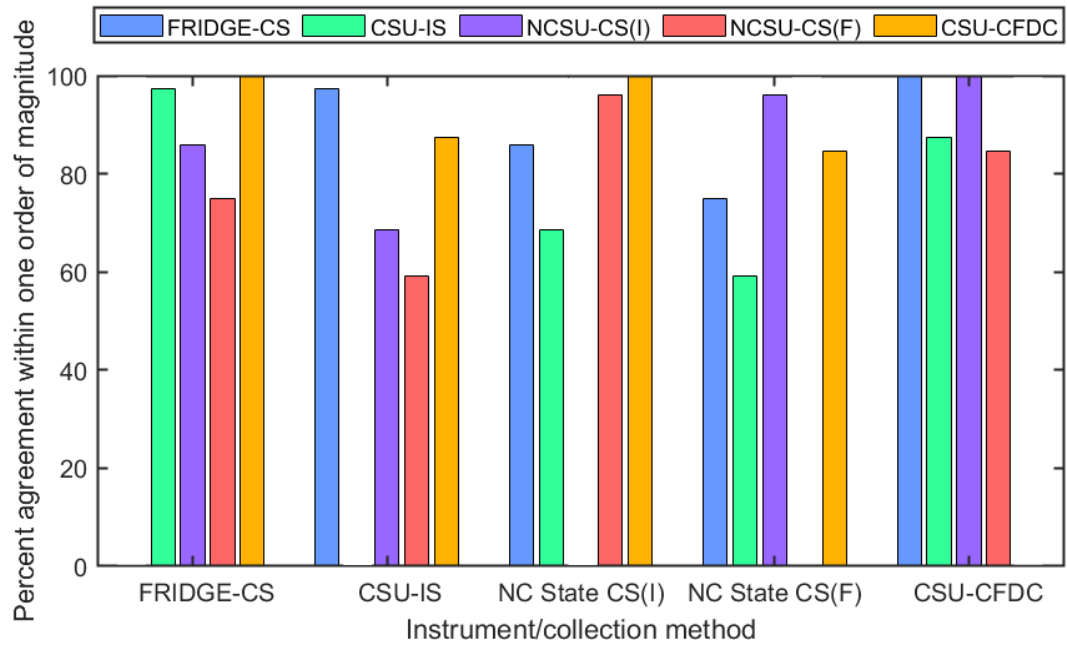

**Figure S3.** The percent of immersion INP measurements in which all instrument pairs agreed within one order of magnitude are shown for each pair of ice nucleation instruments.



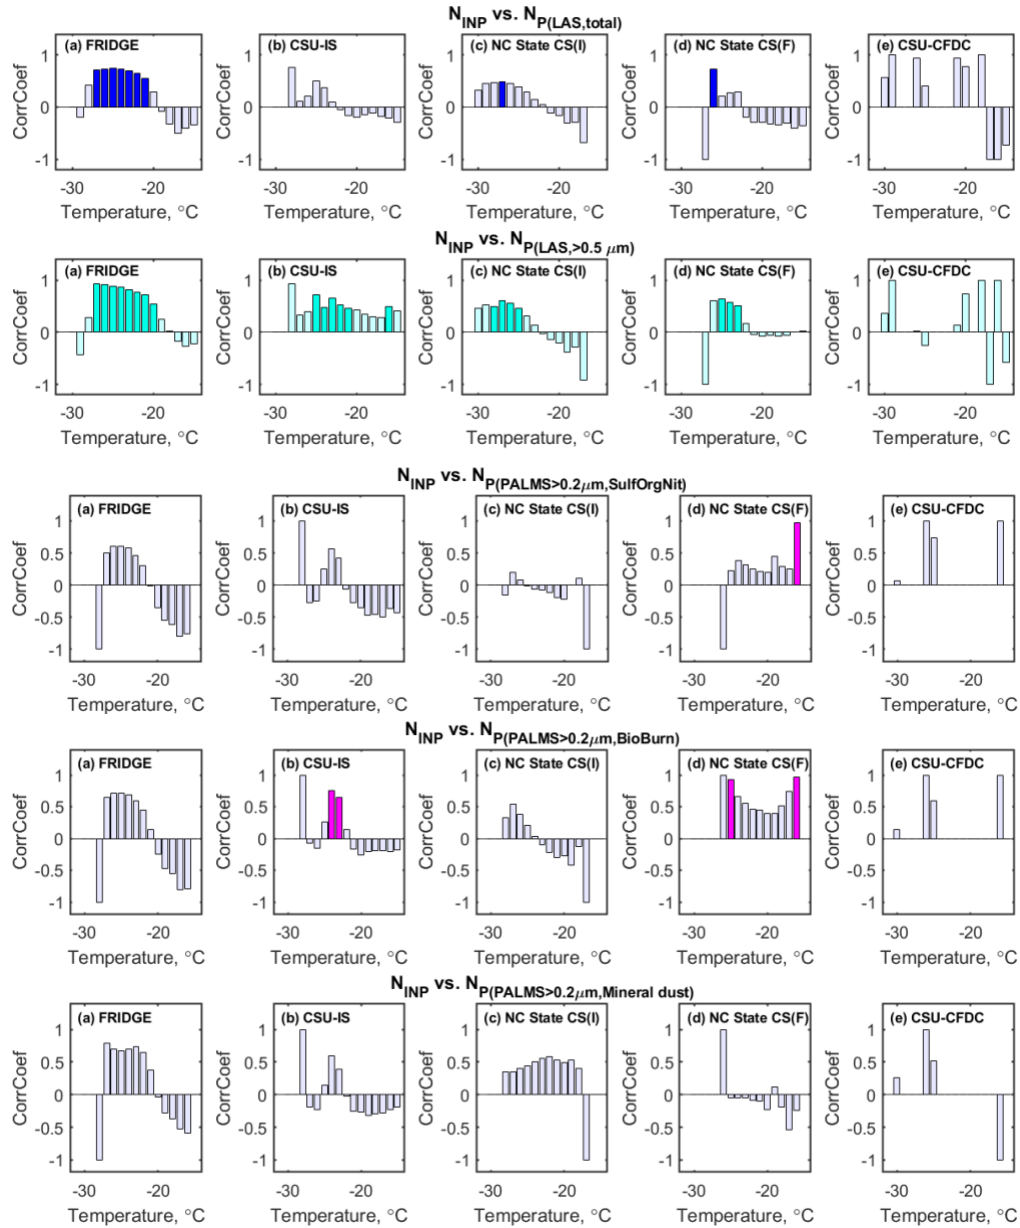

**Figure S4a.** Correlation coefficients in 1°C temperature bins for INPs measured by different methods with aerosol number concentrations from the LAS in all size bins and at sizes  $> 0.5 \mu m$ , and with number concentrations of PALMS sulfate/organic/nitrate, biomass burning and mineral dust particle types at sizes  $> 0.2 \mu m$  (Bright-colored bar =  $p < 0.05$ , Light-colored bar =  $p > 0.10$  or  $p = NaN$  when there were too few samples per bin to derive the p-value)

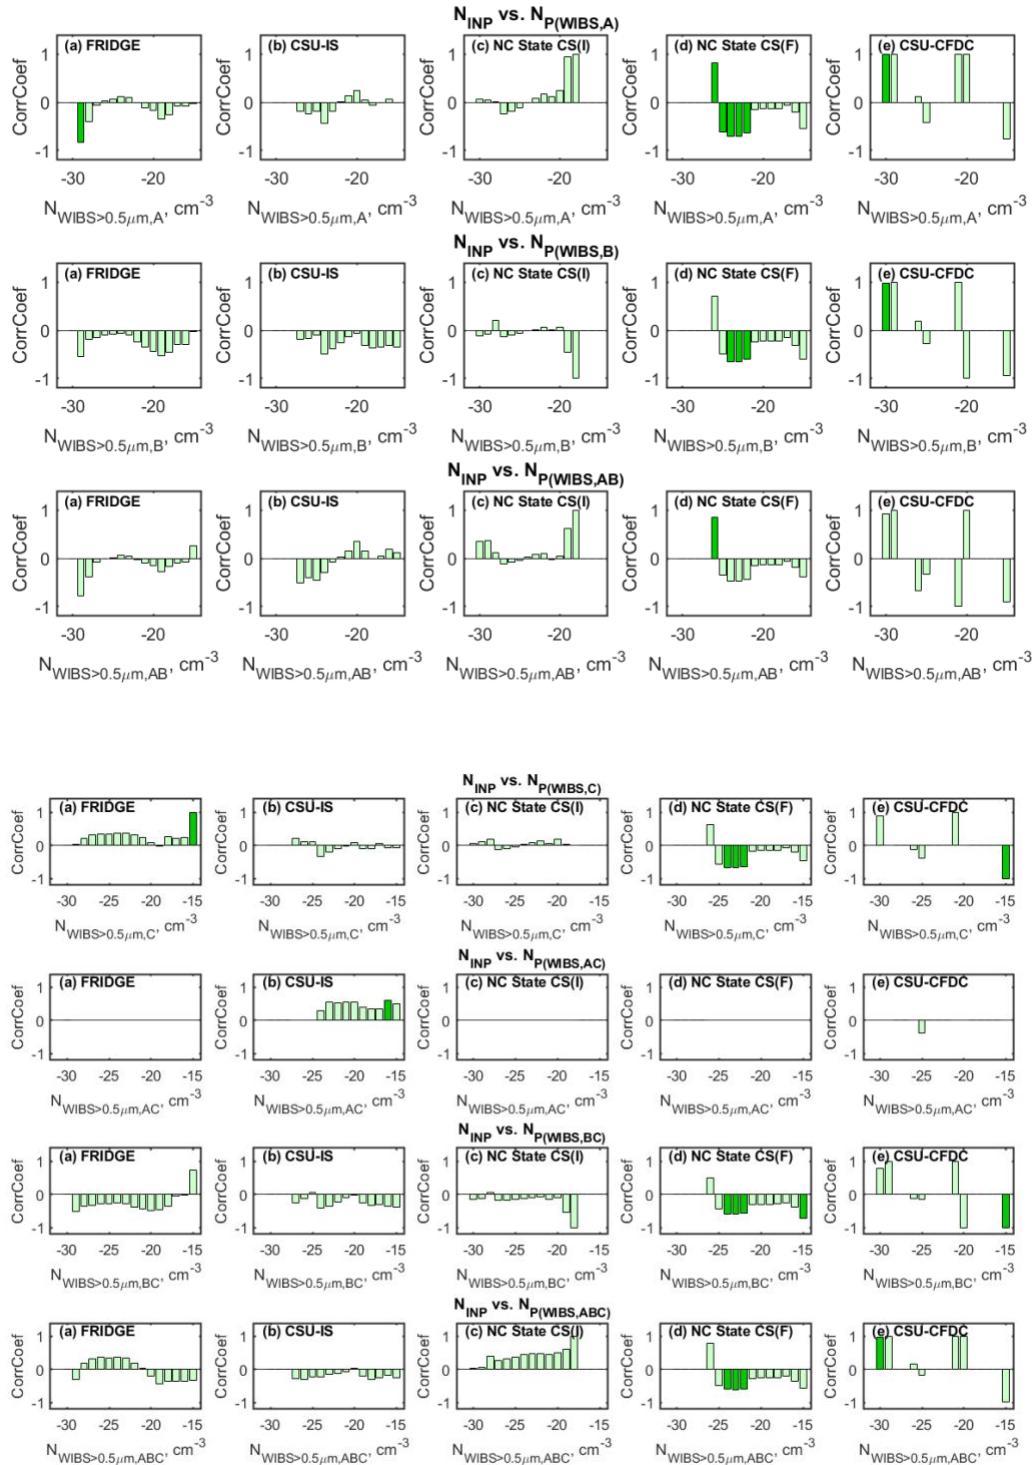

**Figure S4b.** Correlation coefficients in 1°C temperature bins for INPs measured by different methods with WBS category concentrations at sizes > 0.5 μm (Bright-colored bar =  $p < 0.05$ , Light-colored bar =  $p > 0.10$  or  $p = NaN$ )

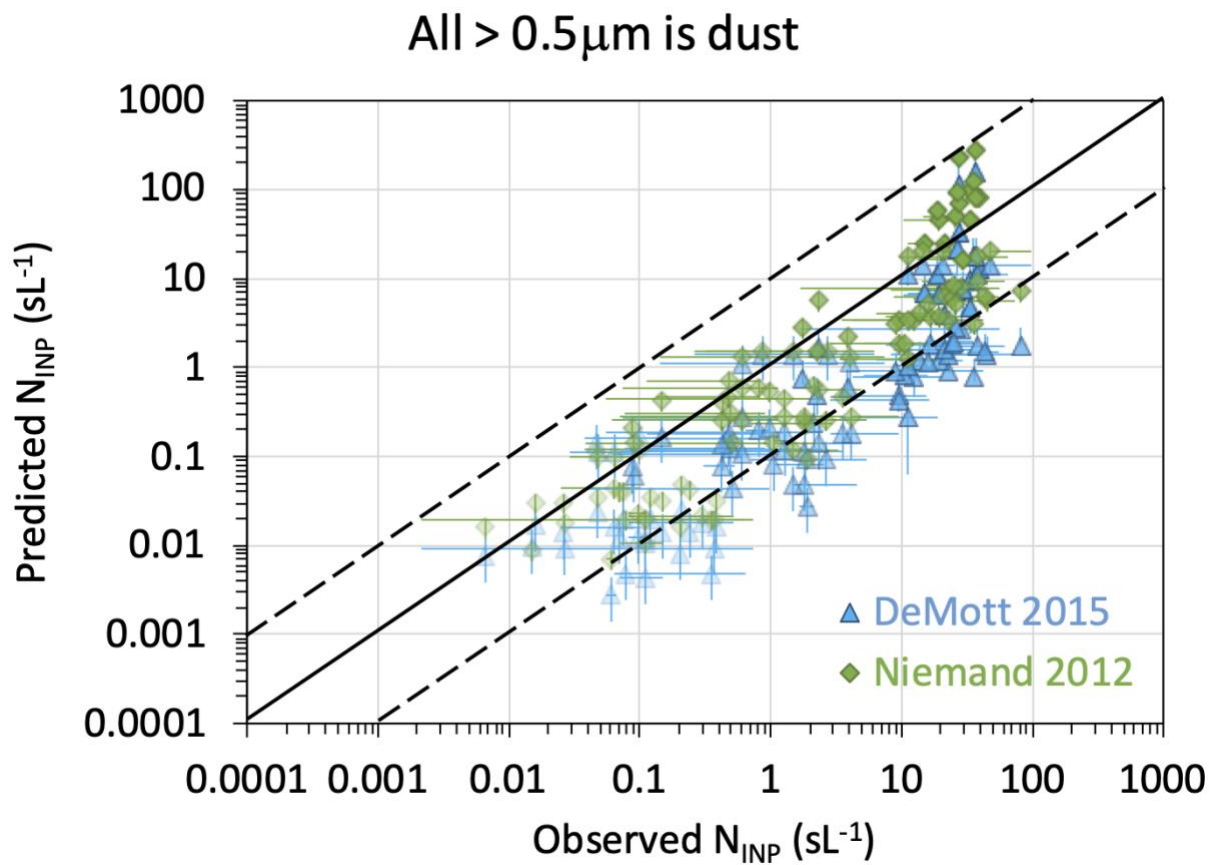

**Figure S5.** As in Figure 9 of the main manuscript, but for dust INP parameterizations on the assumption that all particles at sizes above  $0.5\mu\text{m}$  are dust particles.
